## Retraction

# Retraction: Circular RNA hsa\_circ\_0072309 inhibits non-small cell lung cancer progression by sponging miR-580-3p

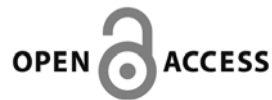

This Retraction follows an Expression of Concern relating to this article previously published by Portland Press.

This article is being retracted from *Bioscience Reports* at the request of the Editor-in-Chief and the Editorial Board following receipt of a notification from a reader, alerting the Editorial Board to a duplicated image in Figure 4D.

The authors were contacted regarding the concerns raised and provided a replacement images for Figures 2D, 3F and 4D, however given that the replacement images for Figure 2D also contained a new duplicated image, the Editorial Board stands by the decision to retract. The authors were contacted in regards to the retraction but did not respond.

Version of Record published:  
 04 May 2021
